# Supplementary material for: Deficiency in Origin Licensing Proteins Impairs Cilia Formation: Implications for the Aetiology of Meier-Gorlin Syndrome
Source: PubMed Central journal article supplement (PMC3597520; doi:10.1371/journal.pgen.1003360), 2013-03-14
Supplement: pgen.1003360.s005.pdf [file pgen.1003360.s005.pdf]

**Supplementary Table 1**

| <b>Gene</b> | <b>Nucleotide Alterations</b>       | <b>Amino Acid Alterations</b> | <b>Exons</b> | <b>Segregation</b> | <b>Current Height (SD)</b> | <b>Current OFC (SD)</b> | <b>Microtia</b> | <b>Absent/small Patellae</b> |
|-------------|-------------------------------------|-------------------------------|--------------|--------------------|----------------------------|-------------------------|-----------------|------------------------------|
| <i>ORC1</i> | [c.314G>A] + [c.1999_2000delGTinsA] | R105Q + V667fsX24*            | 4; 13        | Het                | -9.6                       | -9.8                    | +               | +                            |
| <i>ORC4</i> | c.521A>G                            | Y174C                         | 8            | Hom                | -4.2                       | -2.1                    | +               | -                            |
| <i>ORC6</i> | [c.257_258delTT] + [c.695A>C]       | F86X + Y232S                  | 3; 7         | Het                | -3.3                       | -1.6                    | +               | +                            |
| <i>CDT1</i> | [c.1385G>A] + [c.1560C>A]           | R462Q + Y520X                 | 9; 10        | Het                | -1.6                       | +1.7                    | +               | +                            |
| <i>CDC6</i> | c.968C>G                            | T323R                         | 7            | Hom                | -4.1                       | -3.3                    | +               | +                            |

\* The mutational change in one allele lies within the ORC1 BAH domain and is predicted to be functionally impacting. The mutation in the second allele is a frameshift mutation in the C-terminal region. The cells have normal ORC1 protein expression but diminished chromatin bound ORC1.
